# Supplementary material
Source: Springer Nature journal article supplement (https://www.springermedizin.de/resource/supplementary/12936_2011_1730_MOESM2_ESM.pdf/9541594)

Egg hatch rate

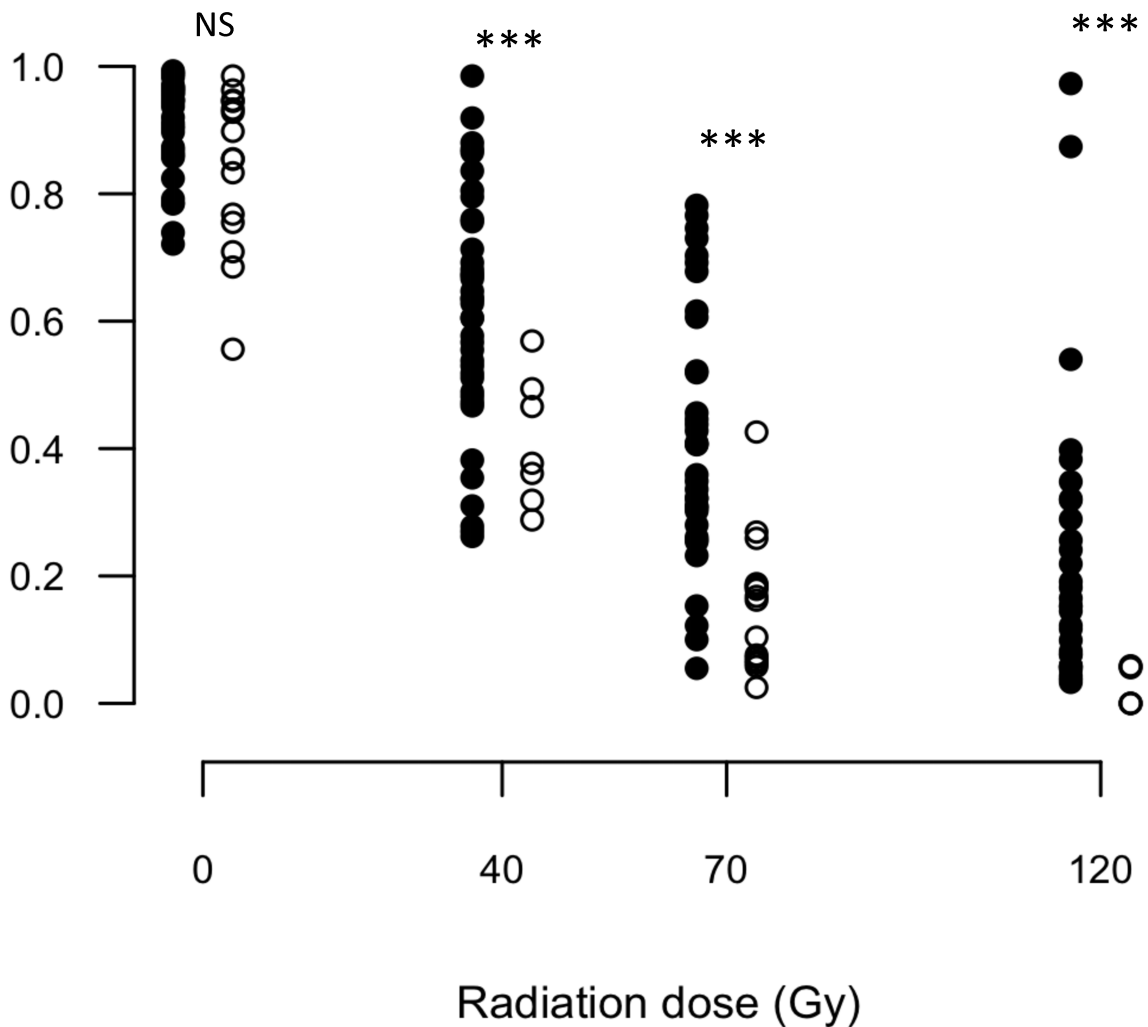

● Separation at the adult stage

○ Separation at the pupal stage

Supplement: MOESM2 [file 9541594]
